# Supplementary material for: Cryptic Species Diversity and Phylogenetic Relationship in the Rust Genus Chrysomyxa from China
Source: MDPI journal article supplement (doi:10.3390/jof8010083), 2022-01-15
Supplement: s1 [file s1]

## Supplementary Material

### 1 Supplementary Tables

Supplementary Table S1. Specimen and sequence data of *Chrysomyxa* used in the molecular analyses in this study.

| Species                   | Specimen no.                     | Host                                 | Origin                             | GenBank or BOLD no. |             |
|---------------------------|----------------------------------|--------------------------------------|------------------------------------|---------------------|-------------|
|                           |                                  |                                      |                                    | LSU                 | ITS         |
| <i>C. arctostaphyli</i>   | <sup>b</sup> DAOM 183586         | <i>Arctostaphylos uva-ursi</i>       | Kenora district, Ontario, Canada   | CHITS053-08         | CHITS053-08 |
|                           | <sup>b</sup> DAOM 229628         | <i>Picea mariana</i>                 | Klondike Loop, Yukon, Canada       | CHITS040-08         | CHITS040-08 |
| <i>C. cassandrae</i>      | <sup>b</sup> QFB25005            | <i>Picea mariana</i>                 | Abitibi, Quebec, Canada            | CHITS052-08         | CHITS052-08 |
|                           | <sup>b</sup> QFB25007            | <i>Chamaedaphne calyculata</i>       | Le'vis, Quebec, Canada             | CHITS004-08         | CHITS004-08 |
| <i>C. chiogenis</i>       | <sup>b</sup> QFB25026            | <i>Gaultheria hispidula</i>          | Charlevoix, Quebec, Canada         | CHITS022-08         | CHITS022-08 |
|                           | <sup>b</sup> Only DNA extraction | <i>Gaultheria hispidula</i>          | Charlevoix, Quebec, Canada         | CHITS031-08         | CHITS031-08 |
| <i>C. conituberculata</i> | * BJFC-MQ02                      | <i>Picea crassifolia</i> Kom.        | Qinghai, China                     | MZ444055            | MZ444048    |
| <i>C. diebuensis</i>      | <sup>a</sup> BJFC-R00556         | <i>Picea asperata</i> Mast.          | Gansu, China                       | MW898417            | KX225393    |
|                           | <sup>a</sup> BJFC-R00507         | <i>Picea asperata</i> Mast.          | Gansu, China                       | MW063523            | KX225394    |
| <i>C. dumeticola</i>      | <sup>a</sup> BJFC-R02706         | <i>Rhododendron micranthum</i> Turcz | Sichuan, China                     | MK874650            | MK770386    |
|                           | <sup>a</sup> BJFC-R02707         | <i>Rhododendron micranthum</i> Turcz | Sichuan, China                     | MK874651            | MK770387    |
| <i>C. empetri</i>         | <sup>b</sup> QFB25033            | <i>Empetrum nigrum</i>               | Radisson, Quebec, Canada           | CHITS032-08         | CHITS032-08 |
|                           | <sup>b</sup> QFB25060            | <i>Empetrum nigrum</i>               | Charlevoix, Quebec, Canada         | CHITS033-08         | CHITS033-08 |
| <i>C. ledi</i>            | <sup>b</sup> DAOM 138900         | <i>Ledum palustre</i>                | Bialowieza Forest, Poland          | CHITS056-08         | CHITS056-08 |
|                           | <sup>b</sup> DAOM 162213         | <i>Picea abies</i>                   | Pudasjärvi, Jonku, Finland         | CHITS059-08         | CHITS059-08 |
|                           | <sup>b</sup> QFB25034            | <i>Picea glauca</i>                  | Chisasibi, Quebec, Canada          | CHITS028-08         | CHITS028-08 |
|                           | <sup>b</sup> Only DNA extraction | <i>Ledum groenlandicum</i>           | Waswanipi River, Canada            | CHITS060-08         | CHITS060-08 |
|                           | <sup>a</sup> BJFC-R02705         | <i>Picea jezoensis</i> Carr.         | Jilin, China                       | MK874654            | MK770390    |
| <i>C. monesis</i>         | <sup>b</sup> DAOM 221985         | <i>Pyrola uniflora</i>               | Graham Island, British             | CHITS044-08         | CHITS044-08 |
|                           | <sup>b</sup> DAVFP 10017         | <i>Picea sitchensis</i>              | Columbia, Canada                   | CHITS107-09         | CHITS107-09 |
| <i>C. nagodhii</i>        | <sup>b</sup> Only DNA extraction | <i>Rhododendron groenlandicum</i>    | Manicouagan, Quebec, Canada        | CHITS065-08         | CHITS065-08 |
|                           | <sup>b</sup> QFB25054            | <i>Picea mariana</i>                 | Charlevoix, Quebec, Canada         | CHITS030-08         | CHITS030-08 |
| <i>C. neoglandulosi</i>   | <sup>b</sup> DAOM 229530         | <i>Ledum glandulosum</i>             | Okanagan, British Columbia, Canada | CHITS042-08         | CHITS042-08 |

|                                |                          |                                               |                                        |             |             |
|--------------------------------|--------------------------|-----------------------------------------------|----------------------------------------|-------------|-------------|
| <i>C. petalina</i>             | * BJFC-JS145             | <i>Picea crassifolia</i> Kom.                 | Qinghai, China                         | MZ444054    | MZ444047    |
| <i>C. piperiana</i>            | <sup>b</sup> DAFVP 14998 | <i>Ledum macrophyllum</i> C.                  | Hope, British Columbia, Canada         | CHITS113-09 | CHITS113-09 |
| <i>C. purpurea</i>             | <sup>a</sup> BJFC-R02299 | <i>Picea purpurea</i> Mast.                   | Sichuan, China                         | MW063518    | KX225401    |
|                                | <sup>a</sup> BJFC-R02300 | <i>Picea purpurea</i> Mast.                   | Sichuan, China                         | MW898418    | KX225402    |
| <i>C. pyrolae</i>              | <sup>b</sup> QFB25056    | <i>Picea sp.</i>                              | Bic, Quebec, Canada                    | CHITS066-08 | CHITS066-08 |
|                                | <sup>b</sup> QFB25055    | <i>Picea glauca</i>                           | Lac St-Jean, Quebec, Canada            | CHITS013-08 | CHITS013-08 |
|                                | <sup>a</sup> BJFC-R02634 | <i>Picea schrenkiana</i> Fischet Mey.         | Xinjiang, China                        | MK874655    | ---         |
| <i>C. qilianensis</i>          | <sup>a</sup> BJFC-R02303 | <i>Picea crassifolia</i> Kom.                 | Qinghai, China                         | MZ444062    | KX225398    |
|                                | <sup>a</sup> BJFC-R02100 | <i>Picea crassifolia</i> Kom.                 | Qinghai, China                         | MW898414    | MW900425    |
|                                | * BJFC-RA27T             | <i>Rhododendron przewalskii</i> Maxim.        | Qinghai, China                         | MW898415    | MW900430    |
|                                | * BJFC-RA44T             | <i>Rhododendron przewalskii</i> Maxim.        | Qinghai, China                         | MW898416    | MW900431    |
| <i>C. retiformis</i>           | * BJFC-MQ11              | <i>Picea crassifolia</i> Kom.                 | Qinghai, China                         | MZ444056    | MZ444049    |
| <i>C. rhododendri</i>          | <sup>b</sup> WM 1183     | <i>Picea abies</i>                            | Obere Chlusi, Bernese, Switzerland     | CHITS009-08 | CHITS009-08 |
|                                | <sup>b</sup> QFB19829    | <i>Rhododendron ferrugineum</i>               | Simplon, Valais, Switzerland           | CHITS036-08 | CHITS036-08 |
|                                | <sup>b</sup> DAFVP 14606 | <i>Ledum lapponicum</i>                       | Summit Pass, British, Columbia, Canada | CHITS105-09 | CHITS105-09 |
|                                | <sup>b</sup> DAFVP 14607 | <i>Ledum lapponicum</i>                       | Summit Pass, British, Columbia, Canada | CHITS106-09 | CHITS106-09 |
|                                | <sup>a</sup> BJFC-R02712 | <i>Ledum palustre</i> L                       | Heilongjiang, China                    | MK874652    | MK770388    |
|                                | <sup>a</sup> BJFC-R02713 | <i>Ledum palustre</i> L                       | Heilongjiang, China                    | MK874653    | MK770389    |
| <i>C. rhododendri-capitati</i> | <sup>a</sup> BJFC-R01054 | <i>Rhododendron lapponicum</i> (L)Wahlenb.    | Qinghai, China                         | MW063519    | MK770382    |
|                                | <sup>a</sup> BJFC-R02433 | <i>Rhododendron laudandum</i> Cowan.          | Tibet, China                           | MW898420    | MW900429    |
| <i>C. strumaria</i>            | * BJFC-RA17              | <i>Rhododendron przewalskii</i> Maxim.        | Qinghai, China                         | MZ444057    | MZ444050    |
|                                | * BJFC-RA40              | <i>Rhododendron przewalskii</i> Maxim.        | Qinghai, China                         | MZ444058    | MZ444051    |
| <i>C. succinea</i>             | <sup>a</sup> BJFC-R02306 | <i>Picea wilsonii</i> Mast.                   | Shaanxi, China                         | MW898419    | KX462882    |
|                                | <sup>a</sup> BJFC-R02307 | <i>Picea wilsonii</i> Mast.                   | Shaanxi, China                         | MK874625    | KX462883    |
|                                | <sup>a</sup> HMAS-6142   | <i>Rhododendron fauriae</i> Franch.           | Japan                                  | ---         | KX462884    |
| <i>C. tsukubaense</i>          | <sup>a</sup> BJFC-R02716 | <i>Rhododendron lepidotum</i> Wall. ex G. Don | Sichuan, China                         | MW898412    | KY963954    |
|                                | <sup>a</sup> BJFC-R02720 | <i>Rhododendron lepidotum</i> Wall. ex G. Don | Sichuan, China                         | MW898413    | MW900428    |
| <i>C. turiformis</i>           | * BJFC-RA27U             | <i>Rhododendron przewalskii</i> Maxim.        | Qinghai, China                         | MZ444059    | MZ444052    |
|                                | * BJFC-RA44U             | <i>Rhododendron przewalskii</i> Maxim.        | Qinghai, China                         | MZ444060    | MZ444053    |

|                          |                          |                                                                                    |                                            |             |             |
|--------------------------|--------------------------|------------------------------------------------------------------------------------|--------------------------------------------|-------------|-------------|
| <i>C. vaccinii</i>       | <sup>b</sup> DAOM 45774  | <i>Vaccinium parvifolium</i>                                                       | Graham Island, British, Columbia, Canada   | CHITS070-08 | CHITS070-08 |
|                          | <sup>b</sup> DAVFP 18160 | <i>Vaccinium parvifolium</i>                                                       | Victoria Island, British, Columbia, Canada | CHITS115-09 | CHITS115-09 |
| <i>C. woroninii</i>      | <sup>b</sup> QFB25009    | <i>Ledum groenlandicum</i>                                                         | Charlevoix, Quebec, Canada                 | CHITS006-08 | CHITS006-08 |
|                          | <sup>b</sup> DAOM 230441 | <i>Picea abies</i>                                                                 | Sodankylä, ruoselkä, Finland               | CHITS072-08 | CHITS072-08 |
|                          | <sup>a</sup> BJFC-QH02   | <i>Picea crassifolia</i> Kom.                                                      | Qinghai, China                             | MW898410    | MW900423    |
|                          | <sup>a</sup> BJFC-QH05   | <i>Picea crassifolia</i> Kom.                                                      | Qinghai, China                             | MW898411    | MW900424    |
| <i>C. yunnanensis</i>    | <sup>a</sup> BJFC-R02336 | <i>Picea likiangensis</i> (Franch.) Pritz. var. <i>linzhiensis</i> Cheng et L.K.Fu | Tibet, China                               | MK874644    | KY211080    |
|                          | <sup>a</sup> BJFC-R02337 | <i>Picea likiangensis</i> (Franch.) Pritz. var. <i>linzhiensis</i> Cheng et L.K.Fu | Tibet, China                               | MK874645    | KY211081    |
| <i>C. zhuoniensis</i>    | <sup>a</sup> BJFC-R02430 | <i>Rhododendron phaeochrysum</i> Balf. f. et W. W. Smith                           | Tibet, China                               | MW066955    | KY963958    |
|                          | <sup>a</sup> BJFC-R00521 | <i>Picea asperata</i> Mast.                                                        | Gansu, China                               | MZ444061    | KX225396    |
| <i>Melampsora epitea</i> | <sup>ab</sup> US0022745  | <i>Salix</i> sp.                                                                   | Abisko, Sweden                             | AF522170    | AY471648    |

BJFC: Museum of Beijing Forestry University, Beijing, China; BPI: U.S. National Fungal Herbarium; DAOM: Agriculture and Agri-Food Canada, Ottawa, ON, Canada; HMAS: Herbarium Mycologicum Academiae Sinicae, Beijing, China; QFB: Rene Pomerleau Herbarium, Canadian Forest Service, Laurentian Forestry Centre, Quebec, Canada; TSH: Mycological Herbarium of the Graduate School of Life and Environmental Sciences, University of Tsukuba, Japan.

<sup>a</sup> Sequences from the GenBank database.

<sup>b</sup> Sequences from BOLD, and indicates sequences from Feau et al. (2011).

<sup>ab</sup> Sequences used as an outgroup.

\*specimens used in this study.

---, Missing information
